# Supplementary material
Source: PubMed Central journal article supplement (PMC5920703)

**MΦDab2<sup>KO</sup>-tp**

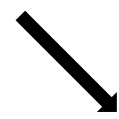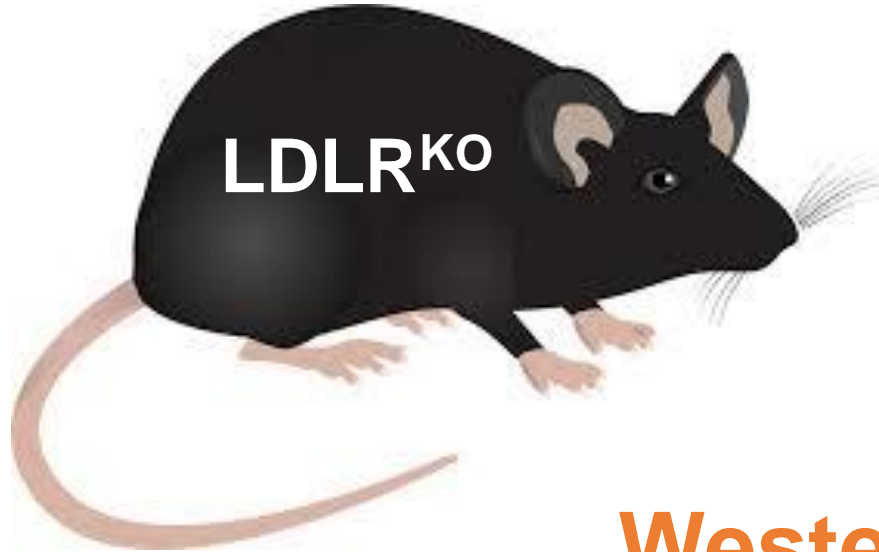

**LDLR<sup>KO</sup>**

**Atherosclerotic lesion**

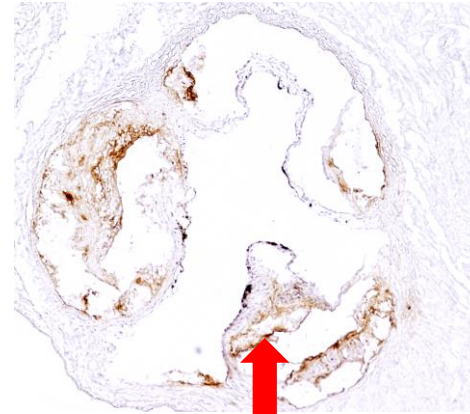

**Liver**

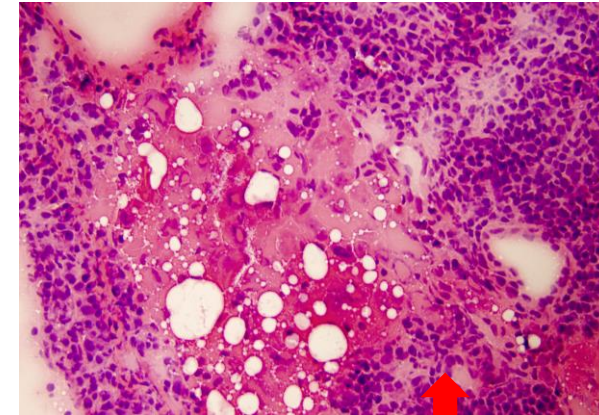

**Western Diet**

**Inflammation**

**MΦDab2<sup>WT</sup>-tp**

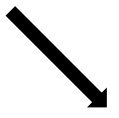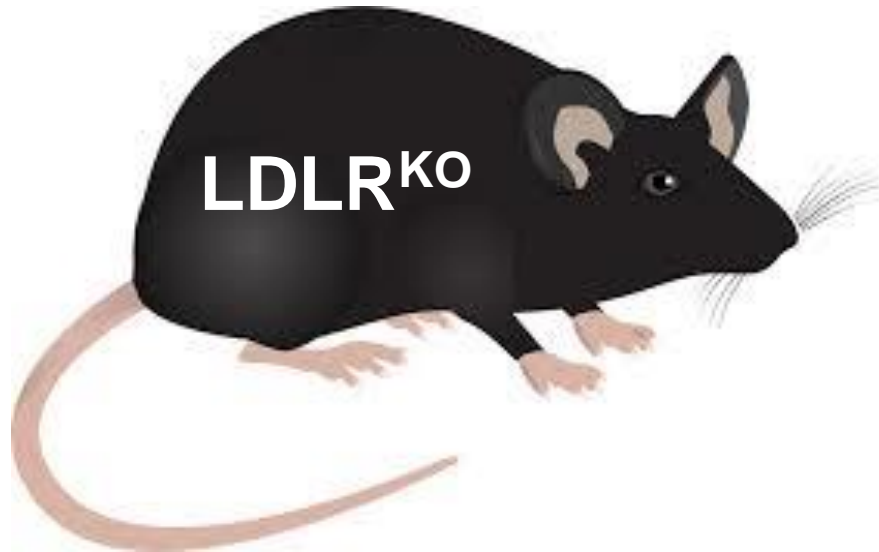

**LDLR<sup>KO</sup>**

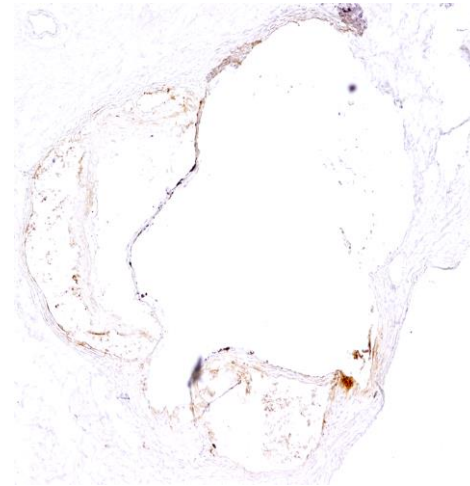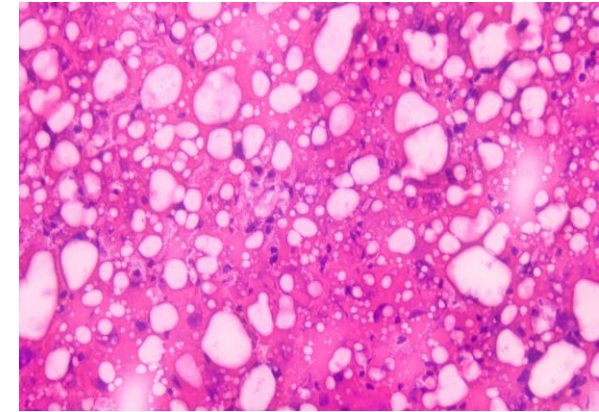

Supplement: NIHMS951892-supplement-Graphic_Abstract.pdf [file NIHMS951892-supplement-Graphic_Abstract.pdf]
