# Supplementary material
Source: PubMed Central journal article supplement (PMC5920703)
Supplement: NIHMS951892-supplement-Supplemental_Figures_1-3.pdf [file NIHMS951892-supplement-Supplemental_Figures_1-3.pdf]

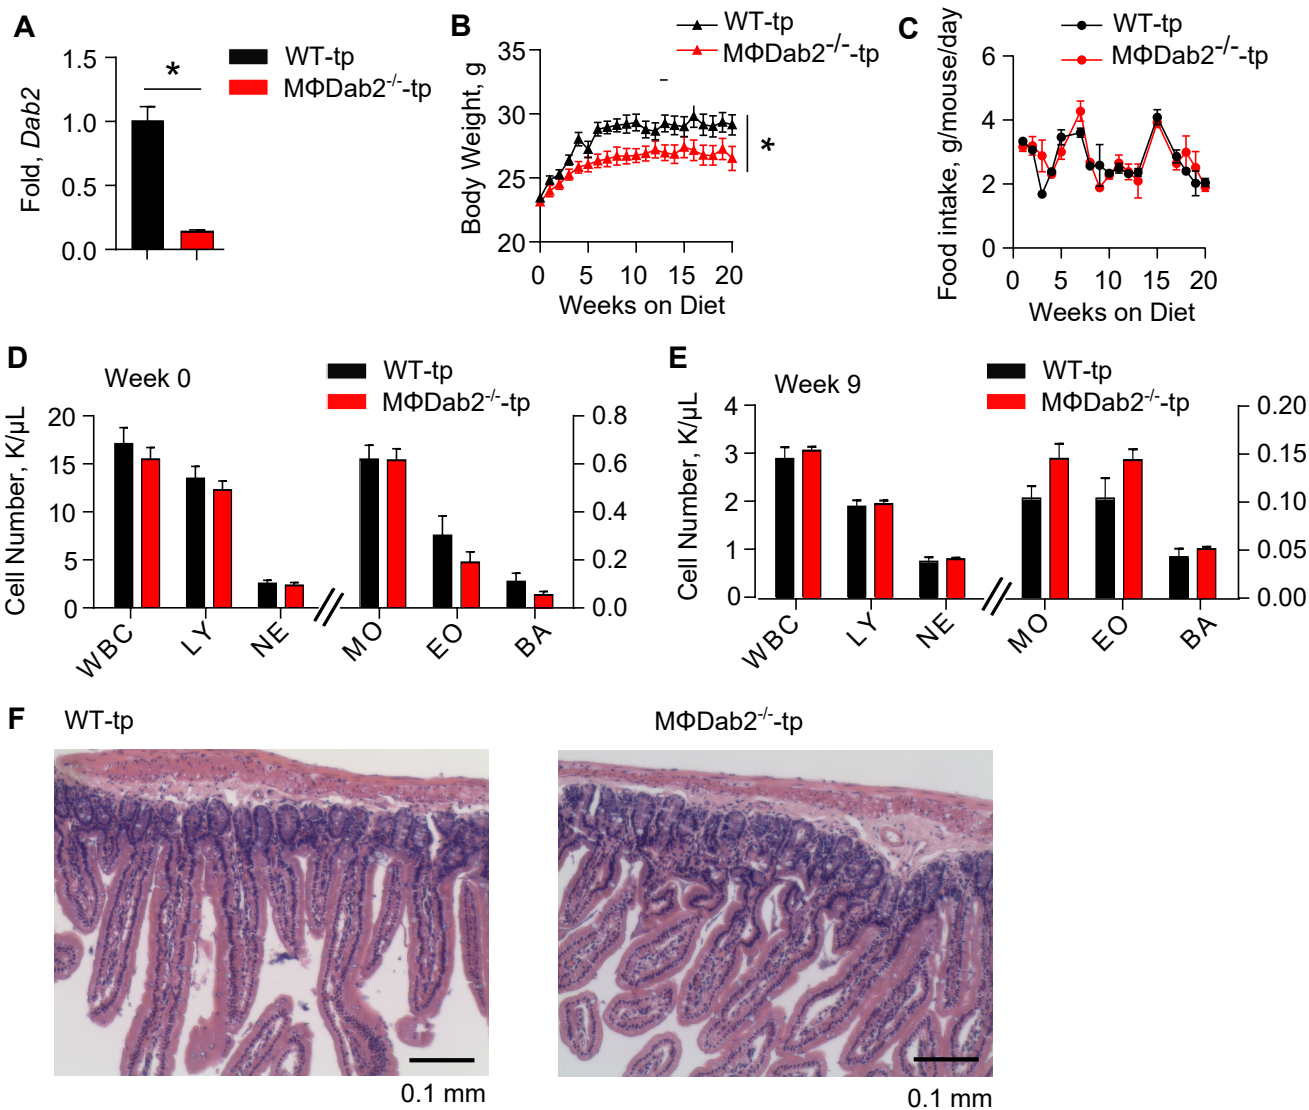

**Supplemental Figure I. Transplant of *Dab2<sup>fl/fl</sup> LysM<sup>Cre</sup>* bone marrow into *LDLR<sup>-/-</sup>* mice results in decreased *dab2* expression in blood and no difference in white blood cell counts. *Dab2* null chimeras gain slightly less weight on western diet but have equivalent food intake as WT chimeras.**

A, *Dab2* mRNA levels in blood were determined in WT-tp and Mφ*Dab2<sup>-/-</sup>*-tp mice (n=20) 4 weeks after transplant. Data are presented as mean +/- s.e.m. \*p<0.0001 by Student's t-test, 2-tailed with Welch's correction for unequal variance.

B, WT-tp and Mφ*Dab2<sup>-/-</sup>*-tp mice (Week 0-9: n=20, Week 10-20: n=12, 11) were fed a western diet and body weight was monitored. Data are presented as mean +/- s.e.m. \*p=0.03 by 2-way ANOVA.

C, Food intake was monitored in a subset of WT-tp and Mφ*Dab2<sup>-/-</sup>*-tp mice (n=5). Data are presented as mean +/- s.e.m.

D,E, Blood analysis from WT-tp and Mφ*Dab2<sup>-/-</sup>*-tp mice (n=20) 4 weeks post transplant prior to western diet feeding (D) and after 9 weeks of western diet feeding (E) showed no difference in white blood cells (WBC), lymphocytes (LY), neutrophils (NE), monocytes (MO), eosinophils (EO), or basophils (BA). Data are presented as mean +/- s.e.m.

F, Representative images of hematoxylin and eosin (H&E) stained small intestine of WT-tp and Mφ*Dab2<sup>-/-</sup>*-tp mice after 20 weeks of western diet.

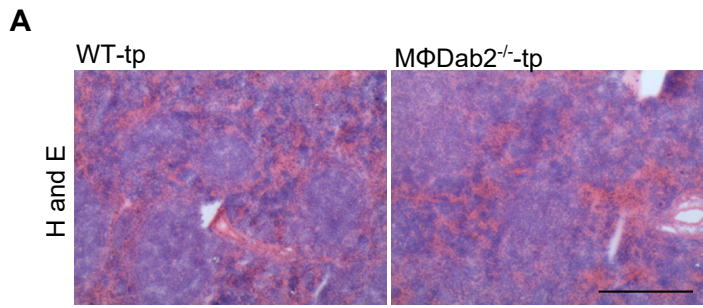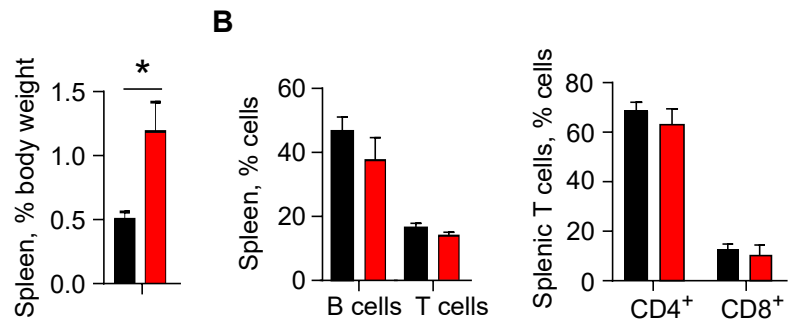

**Supplemental Figure II. After 20 weeks of western diet, spleens of M $\phi$ Dab2<sup>-/-</sup>-tp mice are enlarged compared to WT-tp mice.**

A, Representative images of hematoxylin and eosin (H&E) stained spleens of WT-tp and M $\phi$ Dab2<sup>-/-</sup>-tp mice after 20 weeks of western diet. Scale bar represents 500  $\mu$ m. Spleen weight as a percentage of total body weight was significantly increased in M $\phi$ Dab2<sup>-/-</sup>-tp mice compared to WT-tp mice (n=11, 10) fed a western diet for 20 weeks. Data is presented as mean  $\pm$  s.e.m. \*p=0.016 by Student's t-test, 2-tailed with Welch's correction for unequal variances.

B, Spleens from WT-tp and M $\phi$ Dab2<sup>-/-</sup>-tp mice after 20 weeks of western diet were processed for flow cytometry analysis of B cell and T cell distribution, utilizing CD19 as a marker for B cells and CD3 as a marker for T cells with further analysis of T cell subsets with CD4 and CD8. n=7. Data are presented as mean  $\pm$  s.e.m.

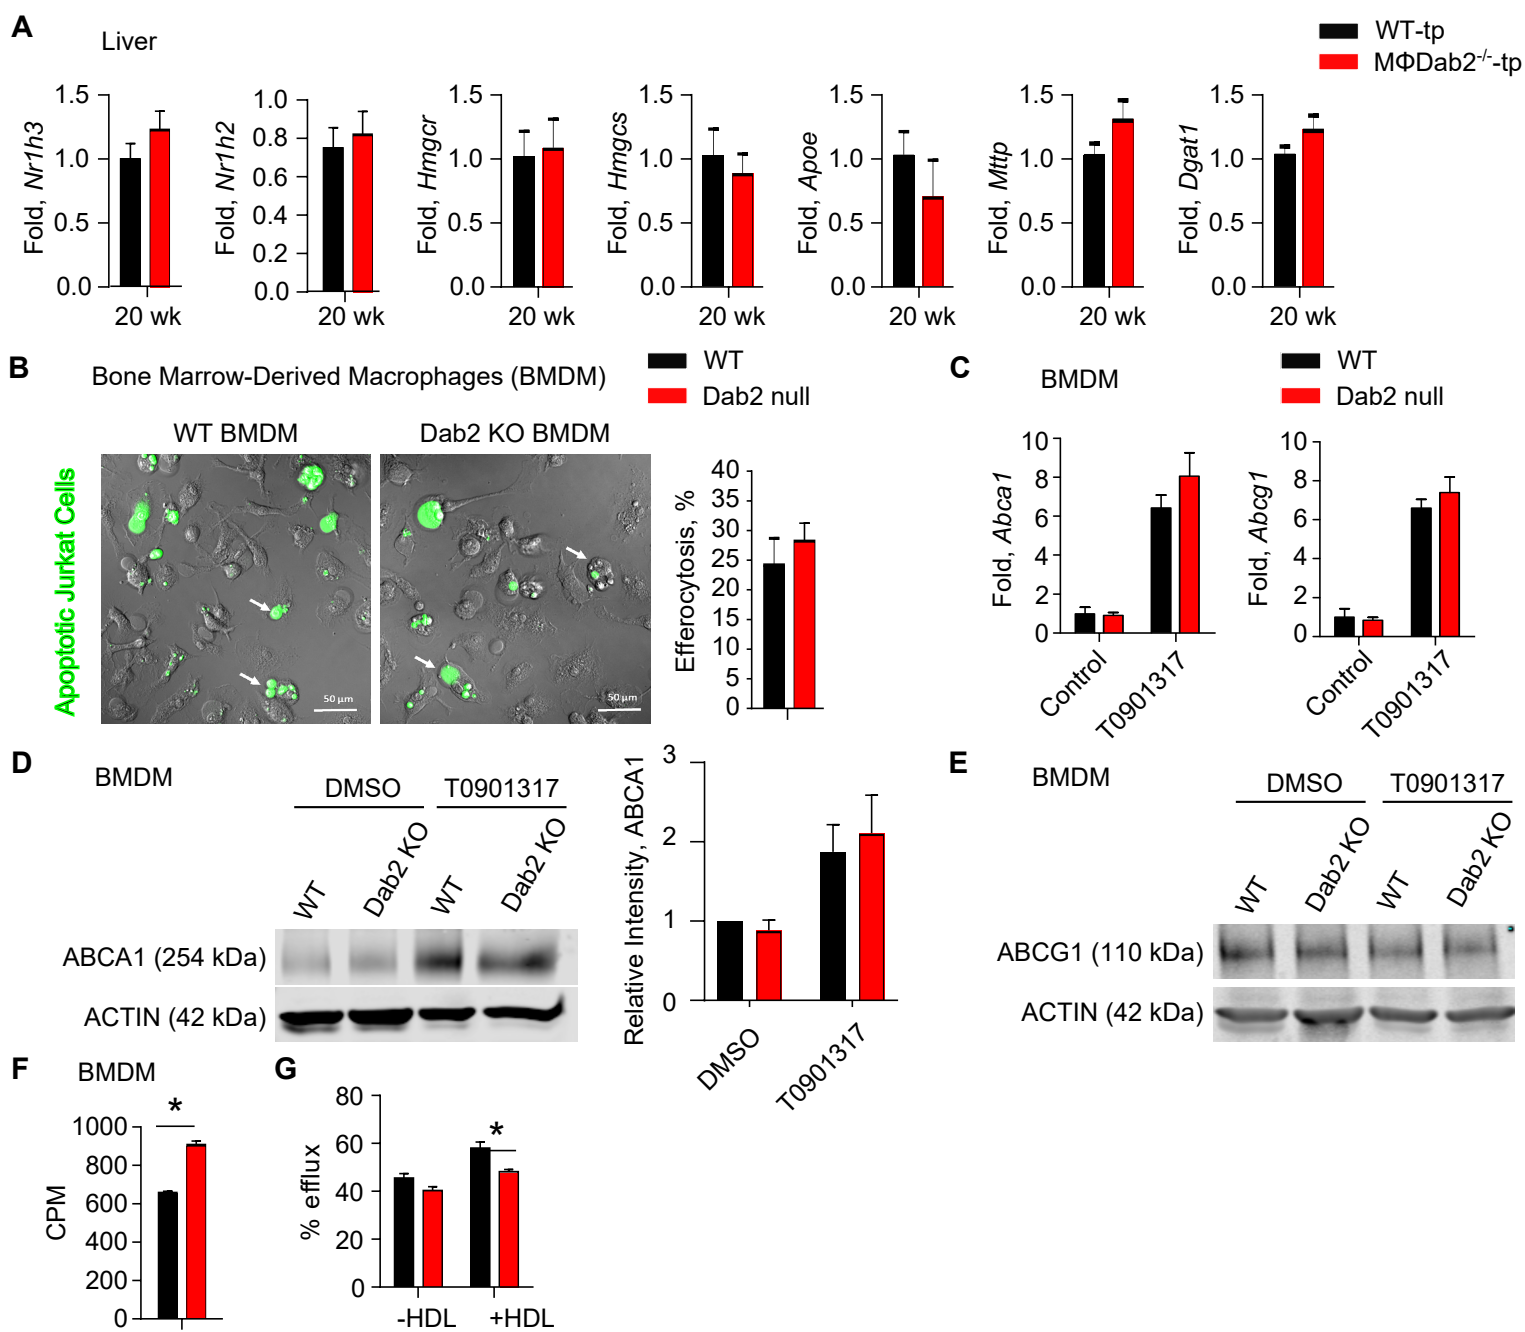

Supplemental Figure III. Analysis of liver expression of lipid metabolism genes and macrophage efferocytosis and cholesterol transport gene expression

A. Expression of genes involved in liver lipid metabolism including *Nr1h3* and *Nr1h2* which encode the liver X receptors, *Hmgcr* and *Hmgcs* which encode HMG-CoA reductase and HMG-CoA synthase, *Apoe*, *Mttp* which encodes microsomal triglyceride transfer protein, and *Dgat1* which encodes diacylglycerol O-acyltransferase 1 was determined by qRT-PCR in liver tissue from WT-tp and M $\Phi$ Dab2<sup>-/-</sup>-tp mice fed a western diet for 20 weeks (n=12, 10). Data is presented as mean  $\pm$  s.e.m.

B. Efferocytosis of apoptotic Jurkat T cells by WT and Dab2 null bone marrow derived macrophages (BMDM) was analyzed by labelling Jurkat T cells with calcein AM (green) and exposing cells to UV irradiation (150 mJ) followed by culture for 3 hours to allow for apoptosis and then incubation with cultured BMDMs for 1 hour at 1:1 ratio. Representative confocal microscopy images show the uptake of apoptotic cells by BMDMs (arrows). Green cells are calcein AM labeled apoptotic Jurkat cells. Quantification of the percentage of apoptotic cell uptake by BMDMs is shown on the right. Data is presented as mean  $\pm$  s.d.

C. Expression of *Abca1* and *Abcg1* was determined by pRT-PCT in WT and Dab2 null BMDMs, before and after treatment with the LXR agonist T0901317. Data are presented as mean  $\pm$  s.e.m.

D. Representative western blot of *Abca1* protein in WT and Dab2 null macrophages treated with DMSO as control or LXR agonist T0901317. Quantification shown on right from experiments performed on three separate days. Data normalized to actin loading control, setting DMSO treated WT BMDM to value of 1. Data are presented as mean  $\pm$  s.e.m.

E. Representative western blot of *Abcg1* protein in WT and Dab2 null macrophages treated with DMSO as control of LXR agonist T0901317. Experiment was performed on 2 separate days with similar results.

F,G. WT and Dab2 null macrophages were incubated with 3H-cholesterol and cholesterol accumulation as well as HDL-mediated efflux were examined as described previously. Data are presented as mean  $\pm$  s.e.m. \*p<0.05 by Student's t-test.

For B-G, WT BMDM were isolated from Dab2<sup>fl/fl</sup> mice and Dab2 null BMDM were isolated from Dab2<sup>fl/fl</sup> LysMCre mice.

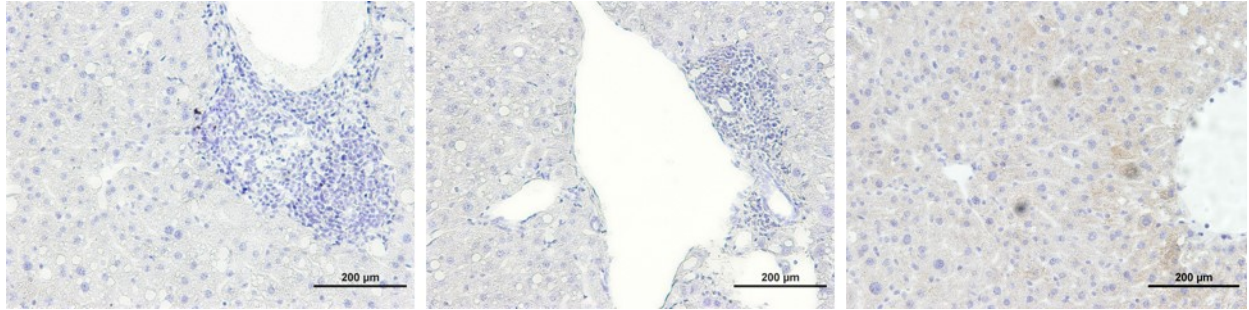

**Supplemental Figure IV. Immunohistochemical analysis of paraffin embedded mouse liver sections with isotype control antibodies.** Liver tissue sections were incubated with the non-immune antibodies of the same isotypes (Rat IgG2b, Rat IgG2a and rabbit IgG control (polyclonal)) at the same concentration as the primary antibodies used for immunostaining of Caspase 3 and  $\alpha$ SMA (in aortic roots) and CD3, B220, and Mac2 -positive cells in liver tissue followed by the incubation with appropriate secondary antibodies. Incubation with isotype controls showed negligible background staining.



**Table 1-PCR primers**

| <b>Gene Name</b>                                | <b>Forward Primer Sequence</b> | <b>Reverse Primer Sequence</b> |
|-------------------------------------------------|--------------------------------|--------------------------------|
| <b>Il6</b>                                      | CCACGGCCTTCCCTACTTCA           | TGCAAGTGCATCATCGTTGTTC         |
| <b>Tnf<math>\alpha</math></b>                   | GAACTGGCAGAAGAGGCACT           | AGGGTCTGGGCCATAGAACT           |
| <b>IL1<math>\beta</math></b>                    | TACCAGTTGGGGA ACTCTGC          | CAAATACCTGTGGCCTTGG            |
| <b>B2M</b>                                      | GCTATCCAGAAAACCCCTCAAATTCA     | GCAGGCGTATGTATCAGTCTCAGTG      |
| <b>Ifny</b>                                     | TTGATGATGACCCTGTGCCTTGG        | GATTCTGAAGTGCTGCGTTGATGG       |
| <b>Cxcl13</b>                                   | AAGAGGTTTGCAGATGGACTT          | CTGCGTTTTACAAGGGTGCA           |
| <b>Lta</b>                                      | CCAAGAATTGGATTCCAGGC           | TGTGACCCTTGAAACAACGGT          |
| <b>Ccl20</b>                                    | GTGGCAAGCGTCTGCTCTTC           | GGTGAGCCAGCAGTACCCAT           |
| <b>Ppara<math>\alpha</math></b>                 | CACTGTTCTGGAGGGTGTA ACTGAC     | GCCATGCCACACGCTGAGG            |
| <b>Abca1</b>                                    | GCTCTCAGGTGGGATGCAG            | GGCTCGTCCAGAATGACAAC           |
| <b>Abcg1</b>                                    | ATCTGAGGGATCTGGGTCTGA          | CCTGATGCCACTTCCATGA            |
| <b>LXR<math>\alpha</math></b><br><b>(Nr1h3)</b> | CTTGCTCATTGCTATCAGCATCTT       | ACATATGTGTGCTGCAGCCTCT         |
| <b>LXR<math>\beta</math></b><br><b>(Nr1h2)</b>  | CAGATGGACGCTTTCATGCG           | CTGCTGTTTCCGAATCTTCTTCT        |
| <b>VLDLR</b>                                    | GAGCCCCTGAAGGAATGCC            | CCTATAACTAGGTCTTTCAGATATGG     |
